# Supplementary material for: Cooperative valorization of lignin and residual sugar to polyhydroxyalkanoate (PHA) for enhanced yield and carbon utilization in biorefineries
Source: Royal Society of Chemistry journal article supplement (doi:10.1039/c9se00021f), 2019-01-01
Supplement: c9se00021f1.pdf [file c9se00021f1.pdf]

**Electronic supplemental information A** Cultivation strategies for improving the polyhydroxyalkanoate (PHA) production using alkaline pretreated lignin stream as a carbon source by *P. putida* KT2440

| Parameters               | Effects of C/N ratio                 | Effects of OD           | Effects of FeSO <sub>4</sub> | Effects of soluble substrates | Effects of cultivation mode                                                                                | Effects of glucose addition |
|--------------------------|--------------------------------------|-------------------------|------------------------------|-------------------------------|------------------------------------------------------------------------------------------------------------|-----------------------------|
| C:N ratio (g/l:g/l)      | 10:0, 10:0.5, 10:1.0, 10:1.5, 10:2.0 | 10:0.5                  | 10:0.5                       | 10:0.5                        | 10:0.5                                                                                                     | 10:0.5                      |
| OD                       | 1.0                                  | 0.5, 1.0, 2.0, 4.0, 8.0 | 1.0                          | 1.0                           | 1.0                                                                                                        | 1.0                         |
| FeSO <sub>4</sub> (mg/l) | 2.5                                  | 0, 1, 2.5, 5, 10        | 2.5                          | 2.5                           | 2.5                                                                                                        | 2.5                         |
| Soluble substrate (g/l)  | 10                                   | 20                      | 20                           | 7.5, 10, 20, 30, 40, 60       | 60                                                                                                         | 20                          |
| Cultivation mode         | Batch                                | Batch                   | Batch                        | Batch                         | Batch 1:60 g/l (0 h)<br>FB 1: 30 g/l (0 h)+30 g/l (18 h)<br>FB 2: 20 g/l (0 h)+20 g/l (18 h)+20 g/l (18 h) | Batch                       |
| Glucose (g/l)            | 0                                    | 0                       | 0                            | 0                             | 0                                                                                                          | 0, 2, 5, 10, 15             |

C:N represents the carbon to nitrogen ratio; NH<sub>4</sub>Cl was used as nitrogen source in the cultivation; FB mode represents fed-batch mode.

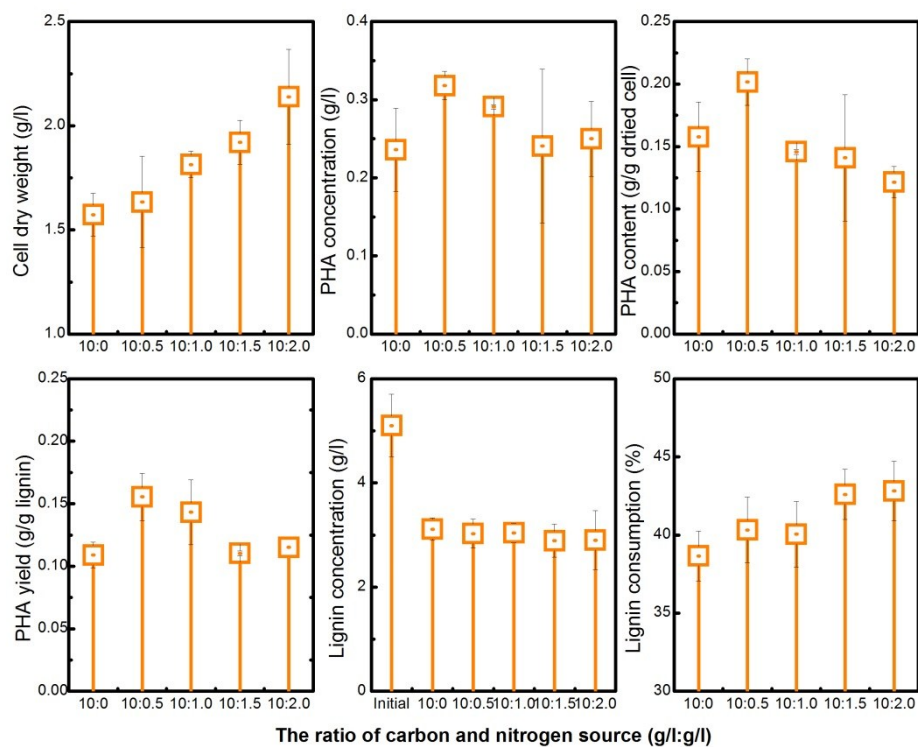

**Electronic supplemental information B** Effects of carbon to nitrogen ratio (C:N) in lignin medium on the cultivation performance by *P. putida* KT2440. Cultivation was conducted at 10 g/l soluble substrate concentration (SSC), inoculum OD 1.0, pH 7.0, 28°C, and 200 rpm for 18 h. Initial represents the lignin concentration at the initial stage of cultivation

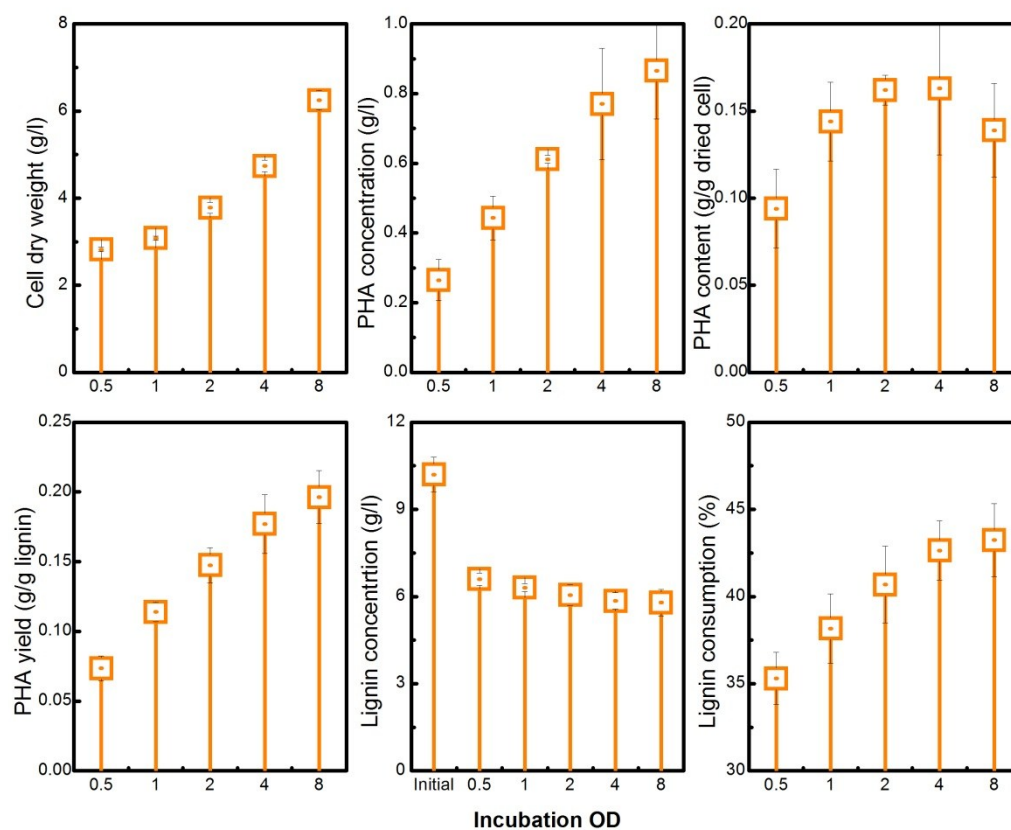

**Electronic supplemental information C** Effects of inoculum OD on the cultivation performance of lignin stream by *P. putida* KT2440. Cultivation was conducted at 20 g/l soluble substrate concentration (SSC), pH 7.0, 28°C, and 200 rpm for 18 h. Initial represents the lignin concentration at the initial stage of cultivation

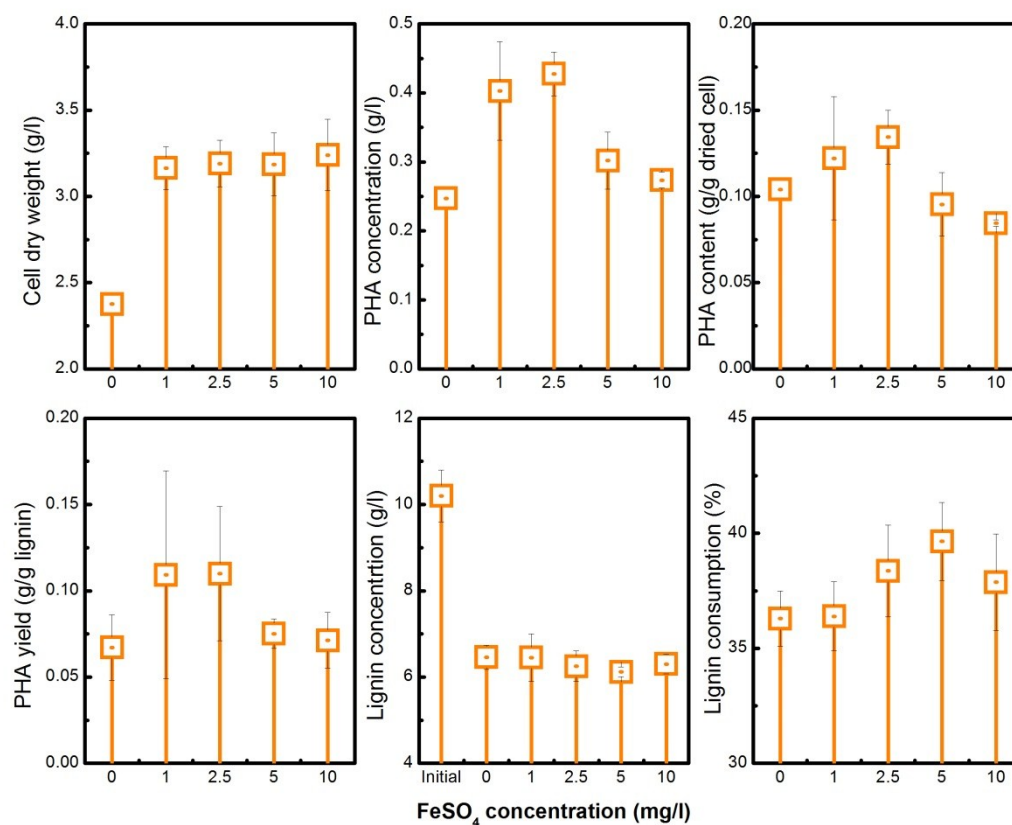

**Electronic supplemental information D** Effects of  $\text{FeSO}_4$  on the cultivation performance of lignin stream by *P. putida* KT2440. Cultivation was conducted at 20 g/l soluble substrate concentration (SSC), inoculum OD 1.0, pH 7.0, 28°C and 200 rpm for 18 h. Initial represents the lignin concentration at the initial stage of cultivation

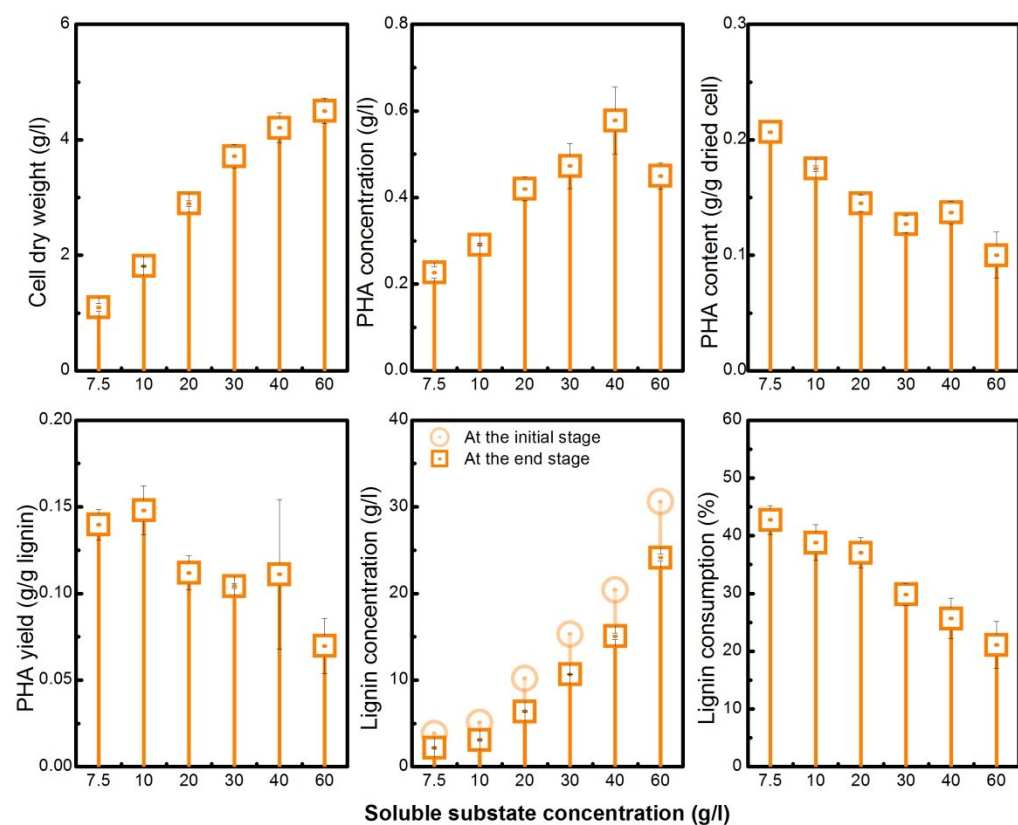

**Electronic supplemental information E** Effects of the soluble substrate concentration (SSC) in the lignin stream on the cultivation performance of polyhydroxyalkanoate (PHA) by *P. putida* KT2440. Cultivation was conducted at inoculum OD 1.0, pH 7.0, 28°C, and 200 rpm for 18 h.

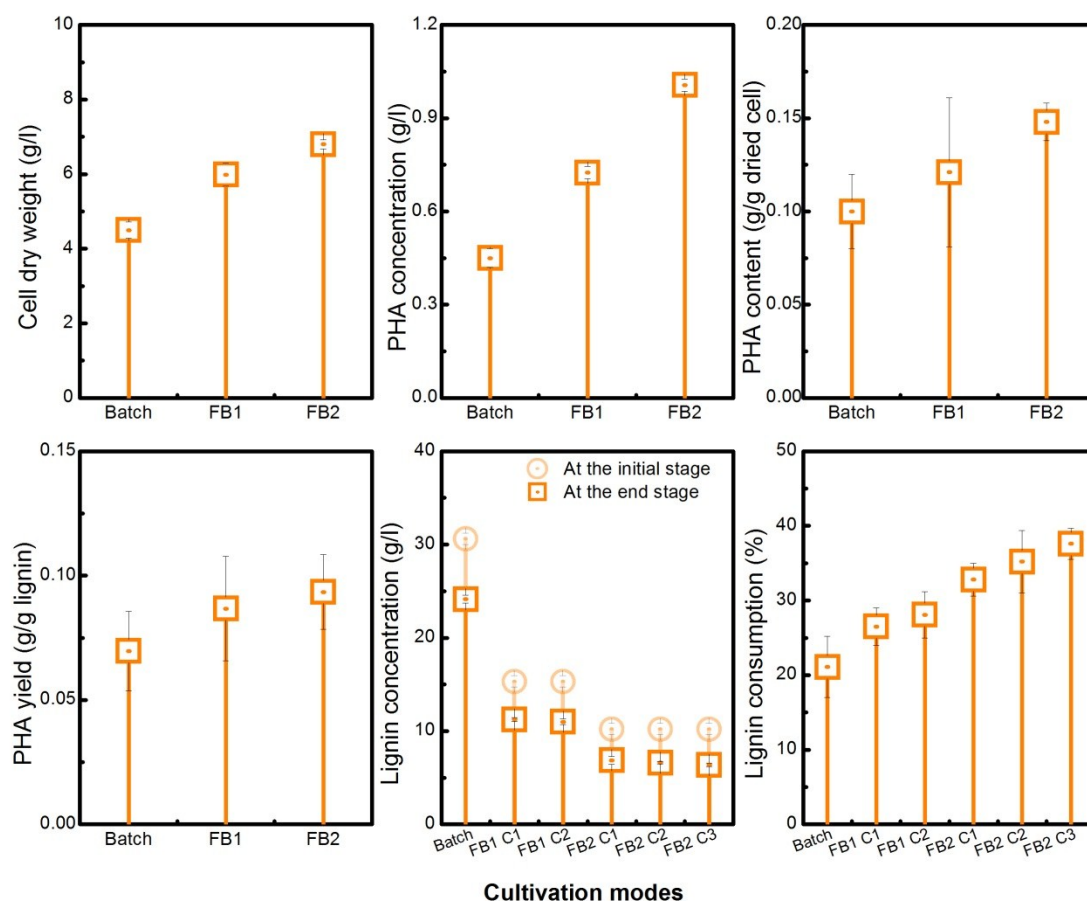

**Electronic supplemental information F** Fed-batch cultivation of the soluble lignin stream for the polyhydroxyalkanoate (PHA) production by *P. putida* KT2440. FB 1 C1 represents fed-batch cultivation cycle 1. Cultivation was conducted at inoculum OD 1.0, pH 7.0, 28°C and 200 rpm.

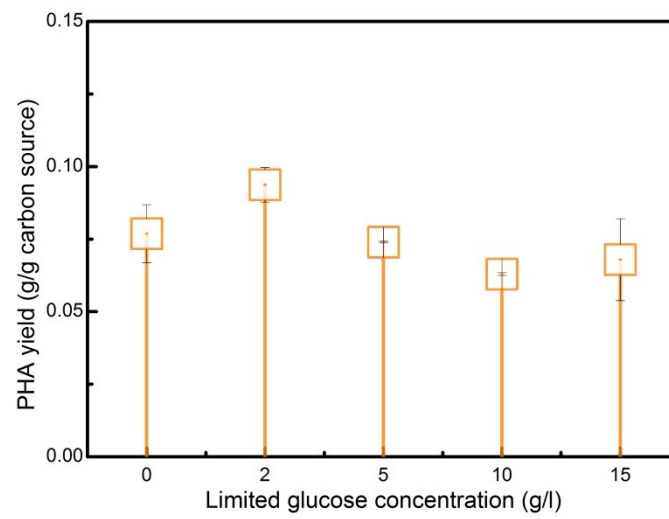

**Electronic supplemental information G** Polyhydroxyalkanoate (PHA) yield based on total carbon source during cultivation using the soluble lignin stream with the addition of limited glucose by *P. putida* KT2440. Cultivation was conducted at pH 7.0, 28°C, and 200 rpm for 18 h.

**Electronic supplemental information H** Compositions in untreated corn stover and solid fractions produced from each biorefinery

|                      | <b>Glucan</b> | <b>Xylan</b> | <b>Arabinan</b> | <b>Galactan</b> | <b>Lignin</b> | <b>Ash</b> | <b>Solid recovery</b> |
|----------------------|---------------|--------------|-----------------|-----------------|---------------|------------|-----------------------|
| <b>UCS</b>           | 29.4 (1.1)    | 17.2 (0.2)   | 0.9 (1.1)       | 0.7 (0.9)       | 13.7 (1.7)    | 5.8 (1.0)  |                       |
| <i>Stage 1</i>       |               |              |                 |                 |               |            |                       |
| <b>Case 1</b>        | 43.6 (1.2)    | 20.0 (0.3)   | 1.0 (1.2)       | 1.7 (1.1)       | 10.7 (1.0)    | 3.6 (0.2)  | 57.9 (2.1)            |
| <b>Cases 2, 4, 6</b> | 45.5 (0.2)    | 16.3 (0.9)   | 0.7 (1.1)       | 1.4 (1.9)       | 24.6 (3.2)    | 3.4 (1.3)  | 54.0 (5.8)            |
| <b>Cases 3, 5, 7</b> | 50.8 (2.1)    | 12.6 (1.3)   | 0.5 (1.5)       | 1.4 (1.2)       | 25.9 (0.7)    | 3.1 (1.2)  | 48.6 (1.1)            |
| <i>Stage 2</i>       |               |              |                 |                 |               |            |                       |
| <b>Case 1</b>        | 24.3 (1.0)    | 14.9 (0.9)   | 0.2 (1.3)       | 2.1 (1.1)       | 32.6 (3.1)    | 2.1 (0.2)  | 33.0 (3.6)            |
| <b>Case 2</b>        | 65.2 (2.1)    | 15.2 (1.2)   | 0.7 (1.6)       | 1.8 (0.1)       | 13.2 (1.5)    | 1.6 (0.6)  | 63.0 (2.6)            |
| <b>Case 3</b>        | 73.8 (1.9)    | 12.1 (0.5)   | 0.7 (1.0)       | 1.4 (1.6)       | 10.2 (1.8)    | 1.2 (1.1)  | 59.7 (3.1)            |
| <b>Cases 4, 6</b>    | 24.4 (0.3)    | 9.8 (1.4)    | 1.0 (1.5)       | 1.7 (1.2)       | 37.7 (1.1)    | 1.9 (1.2)  | 64.0 (1.9)            |
| <b>Cases 5, 7</b>    | 23.6 (0.7)    | 6.3 (0.9)    | 0.7 (1.9)       | 1.9 (1.3)       | 47.9 (3.4)    | 1.4 (2.1)  | 52.6 (1.2)            |

UCS represents untreated corn stover; Water and ethanol extractives in untreated corn stover were 21.4% and 4.2%, respectively; Composition content (%) was calculated based on dry weight. Biorefinery strategies are shown in Table 1 and the detailed information is shown in materials and methods; Standard deviations are shown in parentheses.



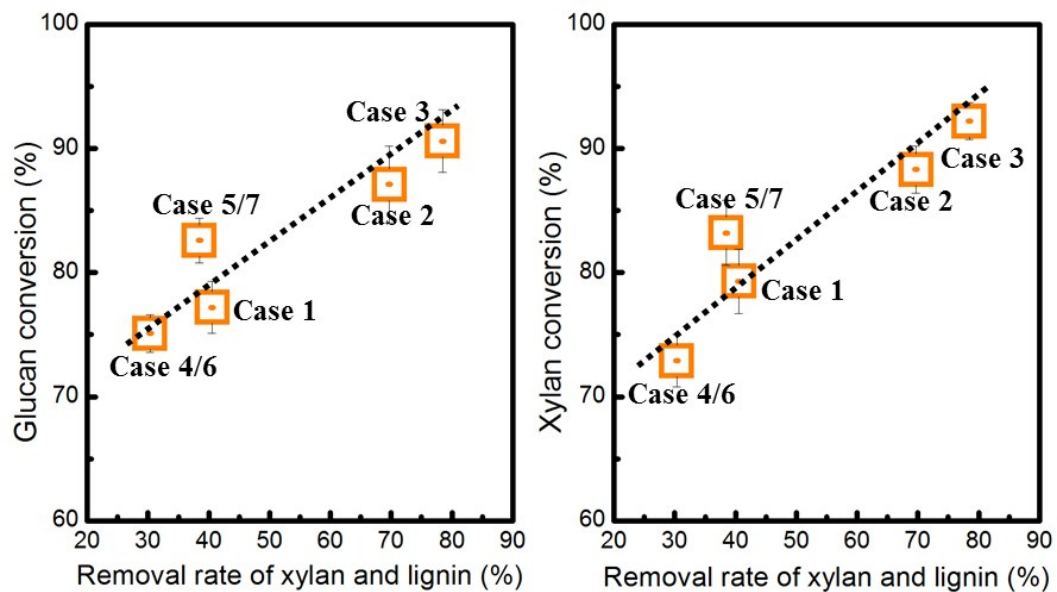

**Electronic supplemental information I** Correlations between glucan/xylan conversion in enzymatic hydrolysis and the removal rate of lignin and xylan in pretreated solid produced from each biorefinery. Biorefinery strategies are shown in Table 1.

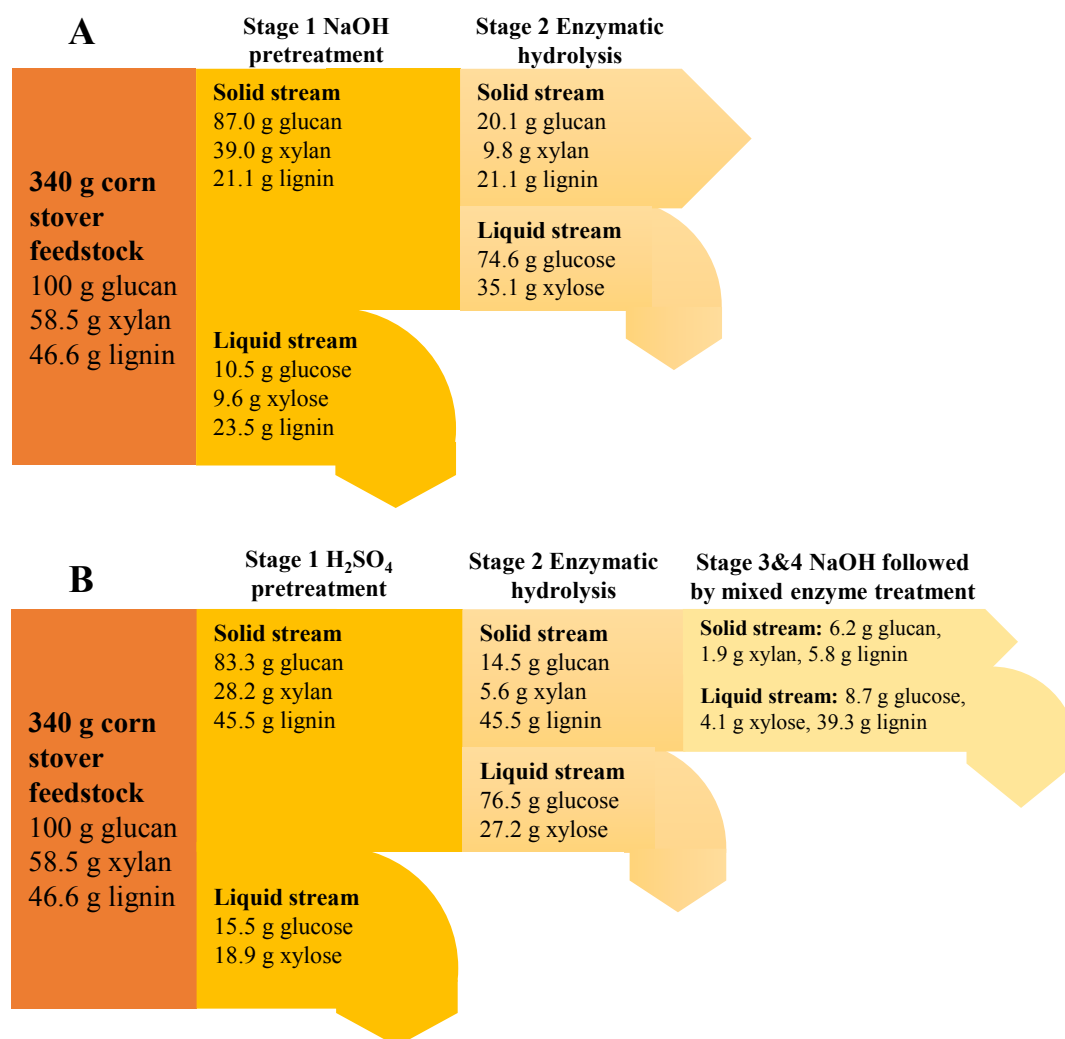

**Electronic supplemental information J** Mass balance in the integrated biorefinery of corn stover. A, Biorefinery using sodium hydroxide pretreatment (Case 1); B, Integrated biorefinery design incorporated with lignin and residual sugar valorization (Case 7)
